# Supplementary material for: Transcriptomic analysis of differential host gene expression upon uptake of symbionts: a case study with Symbiodinium and the major bioeroding sponge Cliona varians
Source: PubMed Central journal article supplement (PMC4144087; doi:10.1186/1471-2164-15-376), 2014-05-16
Supplement: 12864_2013_6178_MOESM2_ESM.pdf [file 12864_2013_6178_MOESM2_ESM.pdf]

PPLEMENTAL TABLE 1

| Normal vs Aposymbiotic        |                                                                           |             |                           |                                                                                     |                                                                    |             |          |               |
|-------------------------------|---------------------------------------------------------------------------|-------------|---------------------------|-------------------------------------------------------------------------------------|--------------------------------------------------------------------|-------------|----------|---------------|
| Increased in Normal           |                                                                           |             | Increased in Aposymbiotic |                                                                                     |                                                                    |             |          |               |
| Contig name                   | Protein name                                                              | Padj        | Blast vs                  | Contig name                                                                         | Protein name                                                       | Padj        | Blast vs |               |
| Contig_273440                 | V-type ATP synthase subunit F                                             | 0.012472931 | Bacteria                  | Contig_106477                                                                       | metallopeptidase                                                   | 0.071866078 | Bacteria |               |
| Contig_61915                  | peptidylprolyl isomerase                                                  | 0.012472931 |                           | Contig_156986                                                                       | O-acetylhomoserine aminocarboxypropyltransferase/cysteine synthase | 0.05405458  |          |               |
| Contig_55287                  | nadh dehydrogenase subunit 5                                              | 0.01775091  |                           | Contig_157706                                                                       | crinkler family protein                                            | 0.070687793 |          |               |
| Contig_55333                  | collagen-like surface protein                                             | 0.024090016 |                           | Contig_201312                                                                       | lipopolysaccharide biosynthesis protein                            | 0.016723914 |          |               |
| Contig_158889                 | aminotransferase                                                          | 0.0280811   |                           | Contig_238382                                                                       | DNA topoisomerase IV subunit A                                     | 0.016723914 |          |               |
| Contig_220009                 | polymerase                                                                | 0.038073654 |                           | Contig_262191                                                                       | malonate decarboxylase subunit delta                               | 0.054967488 |          |               |
| Contig_55166                  | chorismate mutase                                                         | 0.038073654 |                           | Contig_269005                                                                       | sodium/hydrogen exchanger                                          | 0.012626603 |          |               |
| Contig_55141                  | DNA-directed RNA polymerase subunit beta'                                 | 0.040932326 |                           | Contig_59342                                                                        | membrane protein                                                   | 0.012472931 |          |               |
| Contig_204175                 | phasin                                                                    | 0.044018908 |                           | Contig_200895                                                                       | methyl accepting chemotaxis protein                                | 0.012472931 |          |               |
| Contig_55083                  | diphosphate-fructose-6-phosphate 1-phosphotransferase                     | 0.048902651 |                           | Contig_59396                                                                        | gut cathepsin I-like cysteine protease                             | 0.023378011 |          |               |
| Contig_59117                  | proteinase inhibitor                                                      | 0.051695464 |                           | Contig_59497                                                                        | DEAD/DEAH box helicase                                             | 0.0402445   |          |               |
| Contig_73310                  | Porin                                                                     | 0.051695464 |                           | Contig_61555                                                                        | cell surface A33 antigen                                           | 0.052202094 |          |               |
| Contig_51777                  | astacin                                                                   | 0.052732041 |                           | Contig_59339                                                                        | tpr repeat-containing protein                                      | 0.026333566 |          | Cyanobacteria |
| Contig_72576                  | cell-division initiation protein                                          | 0.076345247 |                           | Contig_50894                                                                        | dynamitin                                                          | 0.023378011 |          | Fungi         |
| Contig_261711                 | cytochrome oxidase II                                                     | 0.012472931 | Contig_156555             | DBH-like monoxygenase protein 1                                                     | 0.096926504                                                        | Metazoa     |          |               |
| Contig_264833                 | hemocentin-2                                                              | 0.012472931 | Contig_156675             | ATPase                                                                              | 0.051695464                                                        |             |          |               |
| Contig_59937                  | fibronectin                                                               | 0.012472931 | Contig_156684             | cartilage intermediate layer protein                                                | 0.048902651                                                        |             |          |               |
| Contig_199414                 | cytochrome oxidase I                                                      | 0.016723914 | Contig_157717             | sulfide/quinone oxidoreductase, mitochondrial-like                                  | 0.023378011                                                        |             |          |               |
| Contig_72552                  | basement membrane-specific heparan sulfate proteoglycan core protein-like | 0.01775091  | Contig_200019             | death domain-containing protein                                                     | 0.01775091                                                         |             |          |               |
| Contig_72648                  | TNF receptor-associated factor 3-like                                     | 0.024090016 | Contig_200382             | GTPase IMAP family member 7-like isoform X4                                         | 0.012472931                                                        |             |          |               |
| Contig_60858                  | deleted in malignant brain tumors 1 protein-like, partial                 | 0.0280811   | Contig_200388             | Ras-related protein                                                                 | 0.023378011                                                        |             |          |               |
| Contig_204347                 | lysyl-tRNA synthetase-like                                                | 0.035259701 | Contig_202294             | zinc finger MYM-type protein 1-like                                                 | 0.013414074                                                        |             |          |               |
| Contig_199206                 | RING finger protein                                                       | 0.03805432  | Contig_208315             | titin                                                                               | 0.013301206                                                        |             |          |               |
| Contig_72489                  | astacin                                                                   | 0.03805432  | Contig_208383             | GTPase IMAP family member 4 isoform X1                                              | 0.012472931                                                        |             |          |               |
| Contig_157422                 | ALK tyrosine kinase receptor-like                                         | 0.03805432  | Contig_211234             | hemocentin                                                                          | 0.012472931                                                        |             |          |               |
| Contig_199383                 | TNF receptor-associated factor 3-like                                     | 0.051067272 | Contig_262244             | host cell factor 2-like                                                             | 0.013301206                                                        |             |          |               |
| Contig_63245                  | sporulation-specific protein 15-like                                      | 0.061312247 | Contig_263151             | zinc finger MYM-type protein 1-like                                                 | 0.012472931                                                        |             |          |               |
| Contig_261743                 | X-linked retinitis pigmentosa GTPase regulator-interacting protein 1      | 0.06359639  | Contig_264371             | short-chain collagen C4-like                                                        | 0.035259701                                                        |             |          |               |
| Contig_73070                  | Ig heavy chain V-II region WAH                                            | 0.064679662 | Contig_268330             | protein sidekick-1                                                                  | 0.091240263                                                        |             |          |               |
| Contig_55539                  | tetratricopeptide repeat protein 28-like isoform X3                       | 0.065082182 | Contig_268997             | immunoglobulin-like and fibronectin type III domain-containing protein 1 isoform X2 | 0.083728603                                                        |             |          |               |
| Contig_200816                 | collagen alpha-(I) chain                                                  | 0.071566318 | Contig_271928             | collagen alpha-(I)(XII) chain-like                                                  | 0.012472931                                                        |             |          |               |
| Contig_263087                 | aggregation factor protein 3, form D                                      | 0.076345247 | Contig_276279             | GTPase IMAP family member 4 isoform a                                               | 0.020568358                                                        |             |          |               |
| Contig_55107                  | TPR repeat-containing protein, variant                                    | 0.076345247 | Contig_281237             | ephryn type A-receptor                                                              | 0.01775091                                                         |             |          |               |
|                               |                                                                           |             | Contig_56775              | interferon-induced very large gtpase 1-like                                         | 0.052202094                                                        | Metazoa     |          |               |
|                               |                                                                           |             | Contig_57113              | phenylalanyl hydroxylase                                                            | 0.083728603                                                        |             |          |               |
|                               |                                                                           |             | Contig_58260              | phenylalanyl-tRNA synthetase beta chain                                             | 0.01775091                                                         |             |          |               |
|                               |                                                                           |             | Contig_59159              | aggregation factor protein 3                                                        | 0.024025106                                                        |             |          |               |
|                               |                                                                           |             | Contig_59391              | cre-nas-21 protein                                                                  | 0.048902651                                                        |             |          |               |
|                               |                                                                           |             | Contig_59411              | fibrillin-1- partial                                                                | 0.012472931                                                        |             |          |               |
|                               |                                                                           |             | Contig_59415              | poly [ADP-ribose] polymerase 14                                                     | 0.020919639                                                        |             |          |               |
|                               |                                                                           |             | Contig_59431              | sideroflexin-2                                                                      | 0.044018908                                                        |             |          |               |
|                               |                                                                           |             | Contig_61716              | collagen alpha-(I)(XII) chain-like                                                  | 0.012472931                                                        |             |          |               |
|                               |                                                                           |             | Contig_79428              | phenylalanine-tRNA ligase alpha subunit-like                                        | 0.034521852                                                        |             |          |               |
|                               |                                                                           |             | Contig_95189              | bifunctional aminoacyl-tRNA synthetase                                              | 0.012472931                                                        |             |          |               |
|                               |                                                                           |             | Contig_160769             | kinesin heavy-chain like protein                                                    | 0.022995743                                                        |             |          |               |
|                               |                                                                           |             | Contig_268963             | E1 protein                                                                          | 0.081709943                                                        |             |          |               |
|                               |                                                                           |             |                           |                                                                                     |                                                                    |             | Virus    |               |
| Aposymbiotic vs. Reinfectated |                                                                           |             |                           |                                                                                     |                                                                    |             |          |               |
| Increased in Aposymbiotic     |                                                                           |             | Increased in Reinfectated |                                                                                     |                                                                    |             |          |               |
| Contig name                   | Protein name                                                              | Padj        | Blast vs                  | Contig name                                                                         | Protein name                                                       | Padj        | Blast vs |               |
| Contig_263256                 | valine decarboxylase                                                      | 0.037757567 | Bacteria                  | Contig_210604                                                                       | glutamyl endopeptidase                                             | 0.000409321 | Bacteria |               |
| Contig_117675                 | anykirin                                                                  | 0.028697348 |                           | Contig_210730                                                                       | glutamyl endopeptidase                                             | 0.000480181 |          |               |
| Contig_161887                 | polymorphic outer membrane protein                                        | 0.017569095 |                           | Contig_210563                                                                       | DNA-polymerase                                                     | 0.004304005 |          |               |
| Contig_269005                 | sodium/hydrogen exchanger                                                 | 0.007252336 |                           | Contig_159508                                                                       | collagen-like cell surface-anchored protein ScH                    | 0.017569095 |          |               |
| Contig_59497                  | type iii restriction protein res subunit                                  | 0.053137863 |                           | Contig_262626                                                                       | conserved protein                                                  | 0.018497501 |          |               |
| Contig_208383                 | gtpase imap family member 4                                               | 0.00023642  |                           | Contig_262635                                                                       | lipoprotein                                                        | 0.026591576 |          |               |
| Contig_200382                 | aig1 domain-containing protein                                            | 0.000956975 |                           | Contig_51363                                                                        | viral a-type inclusion protein                                     | 0.03901343  |          |               |
| Contig_59411                  | fibrillin-1- partial                                                      | 0.001201322 |                           | Contig_270979                                                                       | ATP-dependent helicase                                             | 0.031414813 |          |               |
| Contig_95189                  | bifunctional aminoacyl-tRNA synthetase                                    | 0.001361404 |                           | Contig_99090                                                                        | beta gamma crystallin                                              | 0.072813671 |          |               |
| Contig_271928                 | collagen alpha-1 chain-like                                               | 0.00191647  |                           | Contig_212496                                                                       | perforin-like protein                                              | 0.078179642 |          |               |
| Contig_270097                 | hydrocephalus-inducing protein homolog                                    | 0.002657635 |                           | Contig_260915                                                                       | hemocentin 2                                                       | 0.000448262 |          |               |
| Contig_156716                 | PREDICTED: hypothetical protein LOC100640736*                             | 0.005679118 |                           | Contig_210598                                                                       | sarcoplasmic calcium-binding                                       | 0.000448262 |          |               |
| Contig_59342                  | membrane protein                                                          | 0.0063882   |                           | Contig_219184                                                                       | fibrinogen c domain-containing protein 1-a-like                    | 0.000755112 |          |               |
| Contig_221198                 | PREDICTED: hypothetical protein LOC100631580*                             | 0.007252336 |                           | Contig_210698                                                                       | low quality protein: titin                                         | 0.001338735 |          |               |
| Contig_194451                 | metallothionein                                                           | 0.010809295 | Contig_61652              | hypothetical protein BRAFLDRAFT_78705                                               | 0.001500212                                                        |             |          |               |
| Contig_58260                  | phenylalanyl-tRNA synthetase beta chain                                   | 0.016979231 | Contig_105978             | modified aequorin                                                                   | 0.001598761                                                        |             |          |               |
| Contig_281237                 | ephryn type-A receptor 5 isoform X1                                       | 0.017569095 | Contig_61670              | 2-Sa oligoadenylate synthetase                                                      | 0.002195287                                                        |             |          |               |
| Contig_200019                 | PREDICTED: hypothetical protein LOC100649474*                             | 0.017569095 | Contig_211183             | hypothetical protein CGL_10021602                                                   | 0.002881968                                                        |             |          |               |
| Contig_106607                 | dynein heavy chain 6 axonemal-like                                        | 0.018033908 | Contig_262832             | conserved hypothetical protein                                                      | 0.003376712                                                        |             |          |               |
| Contig_276279                 | GTPase IMAP family member                                                 | 0.020364059 | Contig_61779              | peptidase m12a astacin                                                              | 0.003982725                                                        |             |          |               |
| Contig_59415                  | poly ADP ribose polymerase 14-like                                        | 0.02116981  | Contig_156876             | proprotein convertase subtilisin kexin type 9-like                                  | 0.004751185                                                        |             |          |               |
| Contig_160769                 | kinesin heavy-chain-like protein                                          | 0.023632164 | Contig_51058              | scribble                                                                            | 0.011009614                                                        |             |          |               |
| Contig_59396                  | cathepsin I-like cysteine protease                                        | 0.025254867 | Contig_62126              | heme-binding protein 2-like                                                         | 0.020364059                                                        |             |          |               |
| Contig_59159                  | aggregation factor protein 3                                              | 0.027240666 | Contig_51057              | interferon-induced very large gtpase 1-like                                         | 0.024470435                                                        |             |          |               |
| Contig_262191                 | integrase core domain protein                                             | 0.030901343 | Contig_59765              | protein g7c-like                                                                    | 0.033483902                                                        |             |          |               |
| Contig_79428                  | phenylalanine-tRNA ligase alpha subunit isoform 1                         | 0.041888037 | Contig_271027             | fibrinogen-like protein a                                                           | 0.035792456                                                        |             |          |               |
| Contig_221381                 | short-chain collagen c4-like                                              | 0.041888037 | Contig_176284             | calcium binding protein                                                             | 0.057952929                                                        |             |          |               |
| Contig_156555                 | dbh-like monoxygenase protein 1 homolog                                   | 0.051920102 | Contig_263232             | synaptophysin b                                                                     | 0.059542099                                                        |             |          |               |
| Contig_216885                 | bcl-2-like protein 1-like                                                 | 0.052603989 | Contig_198461             | short-chain collagen c4-like                                                        | 0.06392224                                                         |             |          |               |
| Contig_156696                 | cell surface A33 antigen                                                  | 0.056916824 | Contig_263087             | aggregation factor protein 3                                                        | 0.078179642                                                        |             |          |               |
| Contig_222064                 | plekstrin homology-like domain family B member 2-like                     | 0.05765085  | Contig_61631              | protein isoform a                                                                   | 0.08948477                                                         |             |          |               |
| Contig_277901                 | methylmalonyl-CoA carboxyltransferase                                     | 0.05795929  | Contig_261263             | proprotein convertase subtilisin kexin type 9-like                                  | 0.094340998                                                        |             |          |               |
| Contig_59431                  | sideroflexin 2                                                            | 0.05795929  | Contig_161256             | sarcoplasmic calcium-binding                                                        | 0.094340998                                                        |             |          |               |
| Contig_59391                  | cre-nas-21 protein                                                        | 0.064815123 |                           |                                                                                     |                                                                    | Metazoa     |          |               |
| Contig_236109                 | tnf receptor-associated factor 6                                          | 0.064815123 |                           |                                                                                     |                                                                    |             |          |               |
| Contig_235499                 | bhpl protein                                                              | 0.066699101 |                           |                                                                                     |                                                                    |             |          |               |
| Contig_157717                 | sulfide/quinone mitochondrial                                             | 0.067861887 |                           |                                                                                     |                                                                    |             |          |               |
| Contig_230629                 | methylmalonic aciduria and homocystinuria type d mitochondrial-like       | 0.06872428  |                           |                                                                                     |                                                                    |             |          |               |
| Contig_221777                 | tetraspanin-3-like isoform 2                                              | 0.069472619 |                           |                                                                                     |                                                                    |             |          |               |
| Contig_56775                  | interferon-induced very large gtpase 1-like                               | 0.072813671 |                           |                                                                                     |                                                                    |             |          |               |
| Contig_69803                  | probable inactive purple acid phosphatase 27-like                         | 0.072813671 |                           |                                                                                     |                                                                    |             |          |               |
| Contig_219193                 | PREDICTED: uncharacterized protein K02A2.6-like                           | 0.085088634 |                           |                                                                                     |                                                                    |             |          |               |
| Contig_129806                 | Eph receptor tyrosine kinase                                              | 0.085986807 |                           |                                                                                     |                                                                    |             |          |               |
| Contig_156525                 | membrane protein                                                          | 0.088260571 |                           |                                                                                     |                                                                    |             |          |               |
| Contig_221292                 | selenocysteine lyase                                                      | 0.088260571 |                           |                                                                                     |                                                                    |             |          |               |
| Contig_265659                 | Anoctamin                                                                 | 0.094340998 |                           |                                                                                     |                                                                    |             |          |               |
| Contig_204298                 | tollloid-like protein 1                                                   | 0.094340998 |                           |                                                                                     |                                                                    |             |          |               |
| Contig_157706                 | crinkler family                                                           | 0.096901234 |                           |                                                                                     |                                                                    | Fungi       |          |               |
