# Supplementary material for: Transcriptomic analysis of differential host gene expression upon uptake of symbionts: a case study with Symbiodinium and the major bioeroding sponge Cliona varians
Source: PubMed Central journal article supplement (PMC4144087; doi:10.1186/1471-2164-15-376), 2014-05-16

**Total experiment  
(292.182 contigs)**

**N      A      R**

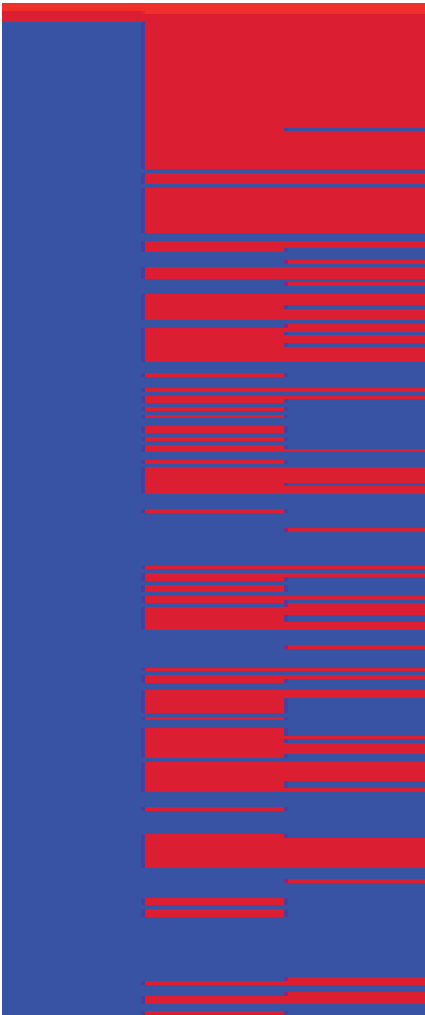

**Contigs over 1000 bp  
(15.636 contigs)**

**N      A      R**

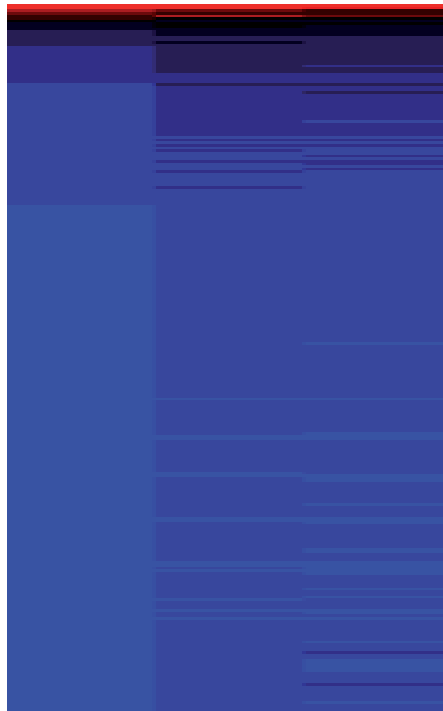

**Selection Difference = 2  
(13.773 contigs)**

**N      A      R**

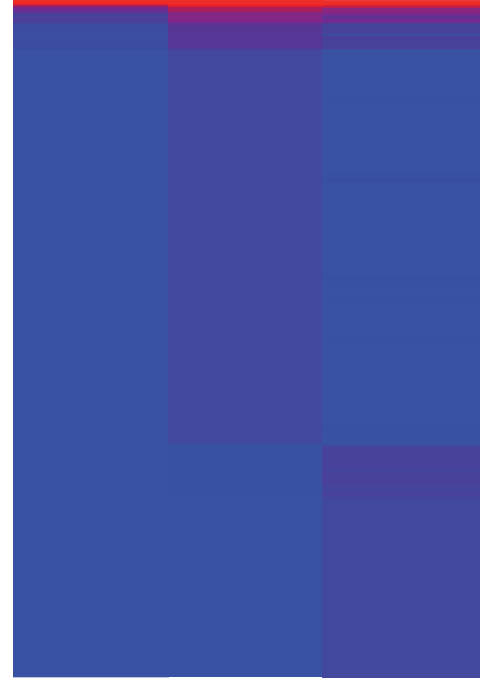

Supplement: 12864_2013_6178_MOESM5_ESM.pdf [file 12864_2013_6178_MOESM5_ESM.pdf]
