# Supplementary material for: Transcriptomic analysis of differential host gene expression upon uptake of symbionts: a case study with Symbiodinium and the major bioeroding sponge Cliona varians
Source: PubMed Central journal article supplement (PMC4144087; doi:10.1186/1471-2164-15-376), 2014-05-16
Supplement: 12864_2013_6178_MOESM6_ESM.pdf [file 12864_2013_6178_MOESM6_ESM.pdf]

Supplemental Table 2

**ENDOSOME, LYSOSOME, PHAGOSOME DATA (From Figure 7)**

| Most significant BLAST result                                                            | Contig ID | Reinf/Apo |
|------------------------------------------------------------------------------------------|-----------|-----------|
| protein tyrosine kinase                                                                  | 51123     | 32.9      |
| receptor-type tyrosine-protein phosphatase f isoform 2 precursor                         | 63341     | 10.1      |
| a chain crystal structure of insulin-like growth factor 1 receptor (igf-1r-wt)           | 66172     | 10.1      |
| copper-transporting atpase 1                                                             | 202378    | 6.3       |
| solute carrier family 15 member 3                                                        | 71004     | 5.1       |
| beta-glucuronidase-like                                                                  | 65668     | 5.1       |
| phosphatidylinositol 3-kinase catalytic subunit type 3                                   | 53024     | 4.3       |
| sialin-like                                                                              | 156883    | 4.0       |
| BAI1-associated protein 3-like                                                           | 64657     | 3.9       |
| vesicle-associated membrane synaptobrevin 7b                                             | 63664     | 3.7       |
| ankyrin repeat domain-containing protein 27                                              | 52683     | 3.4       |
| grip1-associated protein 1                                                               | 262908    | 3.3       |
| proteasome-associated protein ecm29 homolog                                              | 62987     | 3.2       |
| protein tyrosine receptor f                                                              | 57138     | 3.2       |
| glucosylceramidase                                                                       | 200990    | 3.1       |
| two pore calcium channel protein 1A                                                      | 64058     | 3.0       |
| wd repeat-containing protein 48                                                          | 161276    | 2.8       |
| bromodomain and wd repeat-containing protein 3                                           | 53544     | 2.8       |
| phospholipase b-like 2-like                                                              | 63504     | 2.6       |
| lysosomal alpha-mannosidase                                                              | 261092    | 2.6       |
| ephrin type-a receptor 4-like                                                            | 51948     | 2.6       |
| tnf receptor-associated factor 3-like                                                    | 201416    | 2.4       |
| cathepsin b                                                                              | 202630    | 2.4       |
| efflux abc transporter permease atp-binding protein                                      | 63735     | 2.3       |
| h(+) c(-) exchange transporter 3 isoform b                                               | 198883    | 2.3       |
| tnf receptor-associated factor 2/3-like A                                                | 260971    | 2.3       |
| e3 ubiquitin-protein ligase mib2-like A                                                  | 156452    | 2.2       |
| n-acyl ethanolamine-hydrolyzing acid amidase-like                                        | 198571    | 2.2       |
| run and fyve domain containing 2                                                         | 63441     | 2.2       |
| ras-related protein rab-22a                                                              | 201547    | 2.2       |
| sushi, von Willebrand factor type A, EGF, and pentraxin domain-containing protein 1-like | 209184    | 2.1       |
| charged multivesicular body protein 1b                                                   | 62056     | 2.1       |
| t-complex protein 1 subunit alpha-like                                                   | 198605    | 2.1       |
| tnf receptor-associated factor 2/3-like B                                                | 260911    | 2.1       |
| rab family GTPase                                                                        | 61946     | 2.1       |
| mit domain-containing protein 1                                                          | 202199    | 2.1       |
| cap-gly domain-containing linker protein 1                                               | 200503    | 2.0       |
| e3 ubiquitin-protein ligase mib2-like B                                                  | 62707     | 2.0       |
| heparan-alpha-glucosaminide n-acetyltransferase-like                                     | 199277    | 16.6      |
| ubiquitin isoform cra_a                                                                  | 54372     | 9.2       |
| deleted in malignant brain tumors 1 protein-like E                                       | 156484    | 8.6       |
| phosphatidylinositol phosphatase pt prq-like                                             | 261661    | 8.5       |
| chloride transport protein 6B                                                            | 266437    | 6.7       |
| chloride transport protein 6A                                                            | 263101    | 4.8       |
| prolong-density lipoprotein receptor-related protein 1                                   | 156836    | 4.7       |
| run domain beclin-1 interacting and cysteine-rich                                        | 264124    | 4.7       |
| zinc finger fyve domain-containing protein 16                                            | 199661    | 4.6       |
| solute carrier family 15 member 4                                                        | 54904     | 4.0       |
| receptor-type tyrosine-protein phosphatase                                               | 199159    | 3.9       |
| niemann-pick c1 protein C                                                                | 161416    | 3.8       |
| 1-phosphatidylinositol-3-phosphate 5-kinase                                              | 264623    | 3.7       |
| serine/threonine-protein kinase mTOR-like                                                | 64141     | 3.6       |
| polyphosphoinositide phosphatase                                                         | 62699     | 3.6       |
| mitogen-activated protein kinase kinase kinase 4 isoform 4                               | 51365     | 3.5       |
| scy1-like protein 2                                                                      | 156907    | 3.5       |
| deleted in malignant brain tumors 1 protein-like D                                       | 262647    | 3.4       |
| niemann-pick c1 protein B                                                                | 62495     | 3.4       |
| poly(adp-ribose) glycohydrolase-like                                                     | 52192     | 3.3       |
| sid1 transmembrane family member 1                                                       | 66743     | 3.3       |
| ATP-binding sub-family a member 2                                                        | 203188    | 3.1       |
| e3 ubiquitin-protein ligase mib2-like C                                                  | 53120     | 3.1       |
| receptor-type tyrosine-protein phosphatase s                                             | 204010    | 3.1       |
| ubiquitin c                                                                              | 68188     | 3.0       |
| probable serine threonine-protein kinase                                                 | 66020     | 3.0       |
| ATP-binding cassette sub-family b member 9                                               | 201838    | 2.9       |
| niemann-pick c1 protein A                                                                | 263205    | 2.8       |
| nischarin                                                                                | 51310     | 2.7       |
| dedicator of cytokinesis protein 2-like                                                  | 65139     | 2.6       |
| deleted in malignant brain tumors 1 protein-like C                                       | 201276    | 2.6       |
| two pore calcium channel protein 1 B                                                     | 213082    | 2.6       |
| lipopolysaccharide-responsive and beige-like anchor protein                              | 51074     | 2.5       |
| zinc fyve domain containing 20                                                           | 202127    | 2.5       |
| phospholipase d2                                                                         | 99536     | 2.4       |
| deleted in malignant brain tumors 1 protein-like B                                       | 165194    | 2.4       |
| GTPase-activating protein and vps9 domain-containing protein 1                           | 51754     | 2.4       |
| huntingtin                                                                               | 51763     | 2.2       |
| deleted in malignant brain tumors 1 protein-like A                                       | 201701    | 2.1       |
| sans isoform a                                                                           | 201809    | 2.0       |
| neuropathy target esterase                                                               | 52095     | 2.0       |

**CELL DIVISION DATA (From Figure 8A)**

| Most significant BLAST result                                      | Contig ID | Reinf/Apo |
|--------------------------------------------------------------------|-----------|-----------|
| bcl-2 homology protein                                             | 166238    | 17.9      |
| Serine/threonine-protein kinase LMTK1                              | 66172     | 10.1      |
| mitogen-activated protein kinase kinase kinase 3-like              | 156942    | 5.9       |
| cell division cycle protein 23 homolog                             | 261073    | 5.7       |
| centromere protein j                                               | 263874    | 5.7       |
| phosphatidylinositol 3-kinase catalytic subunit type 3-like        | 53024     | 4.3       |
| syntaxin-1A-like                                                   | 64986     | 3.8       |
| dna ligase 1-like                                                  | 158921    | 3.8       |
| synaptobrevin-like                                                 | 63664     | 3.7       |
| anaphase-promoting complex subunit 2-like                          | 201262    | 3.5       |
| structural maintenance of chromosomes protein 5-like               | 62641     | 3.2       |
| endoribonuclease dicer-like                                        | 203025    | 3.2       |
| protein aatf-like                                                  | 262855    | 3.0       |
| CDK-activating kinase assembly factor MAT1-like                    | 62887     | 3.0       |
| serine threonine-protein kinase nek4                               | 198815    | 3.0       |
| citron rho-interacting kinase-like                                 | 201696    | 2.8       |
| structural maintenance of chromosomes protein 4-like               | 51790     | 2.8       |
| regulator of chromosome condensation-like                          | 50946     | 2.5       |
| Serine/threonine-protein kinase Chk2-like                          | 157318    | 2.3       |
| nuclear migration protein nudc-like                                | 210877    | 2.3       |
| mini-chromosome maintenance complex-binding protein                | 64008     | 2.3       |
| structural maintenance of chromosomes protein 2-like               | 200814    | 2.2       |
| wee1-like protein kinase-like                                      | 264255    | 2.2       |
| GTP-binding protein                                                | 161278    | 2.1       |
| cyclin-dependent kinase 11-like                                    | 260921    | 2.1       |
| condensin-2 complex subunit d3-like                                | 50977     | 10.8      |
| SAM domain-containing protein                                      | 52335     | 6.2       |
| SH3 domain-containing protein                                      | 53175     | 6.2       |
| transforming growth factor beta-2 isoform 1                        | 63568     | 5.1       |
| serine/threonine-protein kinase nek8                               | 156456    | 4.2       |
| cell division protein FtsH                                         | 53814     | 4.2       |
| mau2 chromatid cohesion factor homolog                             | 52895     | 3.7       |
| cell division cycle protein 20 homolog                             | 62534     | 3.7       |
| abnormal spindle-like microcephaly-associated protein homolog      | 51974     | 3.5       |
| condensin complex subunit 3                                        | 63122     | 3.2       |
| zinc finger fyve domain-containing protein 26                      | 52835     | 3.1       |
| ras subfamily protein                                              | 261504    | 2.4       |
| achain structure of the mutant fibroblast growth factor receptor 1 | 50994     | 2.3       |
| breast cancer anti-estrogen resistance protein 1                   | 202107    | 2.1       |
| protein elys-like                                                  | 261324    | 2.1       |

**RESPONSE TO STRESS DATA (From Figure 8B)**

| Most significant BLAST result                             | Contig ID | Reinf/Apo |
|-----------------------------------------------------------|-----------|-----------|
| hypoxia up-regulated protein 1-like                       | 263453    | 3.9       |
| transposase domain-containing protein-like                | 52348     | 3.8       |
| translation initiation factor eif-2b subunit epsilon-like | 59955     | 3.6       |
| mitochondrial import receptor subunit tom70               | 201868    | 2.6       |
| dual specificity protein kinase shkc-like                 | 261231    | 2.5       |
| metalloendopeptidase oma1, mitochondrial-like             | 214499    | 2.1       |
| heat shock 70 kDa protein 12a-like                        | 63971     | 10.0      |
| s-adenosyl-L-homocysteine hydrolase                       | 53504     | 7.7       |
| misshapen-like kinase 1-like                              | 51365     | 3.5       |
| mitogen-activated protein kinase kinase kinase 4-like     | 51885     | 2.6       |
| heat shock protein ibpa                                   | 71615     | 2.4       |
| serine threonine-protein kinase smg1                      | 51829     | 2.3       |
| eukaryotic translation initiation factor 3 subunit l-like | 270473    | 2.3       |
| mitogen-activated protein kinase kinase kinase mit-like   | 52945     | 2.1       |
