# Supplementary material for: Transcriptomic analysis of differential host gene expression upon uptake of symbionts: a case study with Symbiodinium and the major bioeroding sponge Cliona varians
Source: PubMed Central journal article supplement (PMC4144087; doi:10.1186/1471-2164-15-376), 2014-05-16
Supplement: 12864_2013_6178_MOESM7_ESM.pdf [file 12864_2013_6178_MOESM7_ESM.pdf]

SUPPLEMENTAL TABLE 3

CONCORDANT EXPRESSION PATTERNS OBSERVED IN RNA-Seq & SSH DATASETS

| SSH gene                                                  | Plasmid | Contig ID | Aposymbiotic | Reinfected | Fold Difference |
|-----------------------------------------------------------|---------|-----------|--------------|------------|-----------------|
| 3-hydroxybutyrate dehydrogenase type 2                    | P32C6   | 271095    | 63           | 127.7      | 2.03            |
| Actin-related protein 2/3 complex subunit                 | P23C11  | 243793    | 128          | 187.1      | 2.03            |
|                                                           |         | 172567    | 4            | 15.2       | 2.03            |
| ATPase, H+ transporting, lysosomal, V0 subunit            | P13C41  | 53216     | 3            | 7.6        | 2.53            |
| Ca2+-triggered coelenterazine-binding protein 2           | P23C14  | 210676    | 54           | 83.4       | 1.54            |
| Calcium-binding protein p22; Calcineurin                  | P2C7    | 62130     | 51           | 88.5       | 1.74            |
| CHK1 checkpoint-like protein                              | P27C3   | 171592    | 12           | 19         | 1.58            |
| Creatine kinase U-type, mitochondrial                     | P32C3   | 198511    | 181          | 228.9      | 1.26            |
| Cyclophilin A                                             | P16C18  | 167197    | 118          | 158        | 1.34            |
|                                                           |         | 110747    | 0            | 1.3        | 1.30            |
| Ephrin type-B receptor 1; Protein tyrosine kinase         | P32C7   | 274042    | 2            | 12.6       | 1.74            |
| Ferritin                                                  | P11C33  | 195181    | 26           | 139.1      | 5.35            |
|                                                           |         | 172589    | 17           | 64.5       | 3.79            |
|                                                           |         | 167071    | 34           | 92.3       | 2.71            |
|                                                           | P24C13  | 244173    | 158          | 173.2      | 1.10            |
|                                                           | P36C7   | 244173    | 158          | 173.2      | 1.10            |
| Ficolin-2                                                 | P10C21  | 219184    | 0            | 502        | 502.00          |
| G-protein gamma subunit                                   | P35C2   | 243780    | 232          | 256.7      | 1.11            |
| Gamma-interferon-inducible lysosomal thiol reductase-like | P34C1   | 106065    | 94           | 279.4      | 2.97            |
| Glutamine synthetase                                      | P       | 211494    | 82           | 127.7      | 1.56            |
| Heat shock protein 70                                     | P8C27   | 194534    | 43           | 102.4      | 2.38            |
| Inorganic pyrophosphatase                                 | P35C14  | 210752    | 13           | 22.8       | 1.75            |
|                                                           |         | 172365    | 1            | 3.8        | 3.80            |
| MafB chain A                                              | P22C7   | 161183    | 1073         | 1165.8     | 1.09            |
| Neurogenin locus notch protein homolog (neuregulin)       | P24C3   | 271685    | 39           | 107.5      | 2.76            |
| Nuclear pore complex Nup50 (nucleoporin)                  | P4C11   | 262759    | 30           | 46.8       | 1.56            |
| Proteasome subunit alpha                                  | P15C16  | 62102     | 51           | 160.6      | 3.15            |
| Proteasome subunit beta                                   | P1C1    | 176676    | 4            | 26.6       | 6.65            |
| Ribonuclease K-like; Salivary secreted ribonuclease       | P8C8    | 211219    | 133          | 166.9      | 1.25            |
|                                                           |         | 211658    | 141          | 244        | 1.73            |
| Ribosomal proteins                                        | P2C6    | 217593    | 39           | 65.7       | 1.68            |
|                                                           |         | 169342    | 5            | 24         | 4.80            |
|                                                           | P8C6    | 173368    | 58           | 112.5      | 1.94            |
|                                                           |         | 172754    | 28           | 68.3       | 2.44            |
|                                                           | P8C4    | 176954    | 0            | 1.3        | 1.30            |
|                                                           | P11C27  | 238142    | 8            | 22.8       | 2.85            |
|                                                           | P15C13  | 172015    | 176          | 244        | 1.39            |
|                                                           | P15C15  | 198299    | 150          | 206.1      | 1.37            |
|                                                           | P31C6   | 173368    | 58           | 112.5      | 1.94            |
|                                                           |         | 172754    | 28           | 68.3       | 2.44            |
| RNA polymerase-associated protein LEO1                    | P11C31  | 62675     | 17           | 31.6       | 1.86            |
| Selenoprotein Jb; J1a crystallin                          | P24C6   | 106592    | 177          | 209.9      | 1.19            |
| Serum response factor                                     | P27C2   | 196572    | 839          | 921.7      | 1.10            |
|                                                           | P35C12  | 196572    | 839          | 921.7      | 1.10            |
| Sulfide quinone reductase                                 | P34C7   | 201177    | 119          | 292.1      | 2.45            |
| Thymosin beta                                             | P23C16  | 219534    | 494          | 584.1      | 1.18            |
| Tubulin alpha chain                                       | P9C12   | 168747    | 63           | 150.5      | 2.39            |
| Vacuolar sorting protein; sortilin-related receptor       | P14C3   | 159535    | 0            | 17.7       | 17.70           |
| WAS protein family homolog 1 (DAF)                        | P14C7   | 211902    | 15           | 65.7       | 4.38            |
| Hypothetical proteins                                     | P14C8   | 167347    | 13           | 127.7      | 9.82            |
|                                                           |         | 117374    | 1            | 1.3        | 1.30            |
|                                                           | P16C17  | 167347    | 13           | 127.7      | 9.82            |
|                                                           |         | 117374    | 1            | 1.3        | 1.30            |

CONFLICTING EXPRESSION PATTERNS OBSERVED IN RNA-Seq & SSH DATASETS

| SSH gene                                                                                            | Plasmid | Contig ID | Aposymbiotic | Reinfected | Fold Difference |
|-----------------------------------------------------------------------------------------------------|---------|-----------|--------------|------------|-----------------|
| AP-2 complex subunit beta (adaptor-related protein)                                                 | P23C6   | 245152    | 22           | 13.9       | 0.63            |
|                                                                                                     |         | 279831    | 1            | 2.5        | 2.50            |
| Cytoskeletal actin                                                                                  | P8C5    | 202762    | 21           | 35.4       | 1.69            |
|                                                                                                     |         | 204121    | 869          | 441.3      | 0.51            |
|                                                                                                     |         | 225184    | 528          | 288.3      | 0.55            |
|                                                                                                     | P11C32  | 202762    | 21           | 35.4       | 1.69            |
|                                                                                                     |         | 204121    | 869          | 441.3      | 0.51            |
|                                                                                                     |         | 225184    | 528          | 288.3      | 0.55            |
| Deleted in malignant brain tumors 1 protein-like; Scavenger receptor cysteine-rich type protein     | P11C30  | 262647    | 336          | 98.6       | 0.29            |
|                                                                                                     |         | 195761    | 113          | 163.1      | 1.44            |
|                                                                                                     | P23C4   | 262647    | 336          | 98.6       | 0.29            |
|                                                                                                     |         | 195761    | 113          | 163.1      | 1.44            |
| Dihydropyridyl dehydrogenase                                                                        | P16C20  | 167771    | 3            | 40.5       | 13.50           |
|                                                                                                     |         | 162396    | 6            | 0          | 0.17            |
|                                                                                                     |         | 213269    | 9            | 20.2       | 2.24            |
| Dynein heavy chain                                                                                  | P20C8   | 262328    | 402          | 193.5      | 0.48            |
|                                                                                                     |         | 7062      | 0            | 1.3        | 1.30            |
| Tyrosine 3-monooxygenase/tryptophan 5-monooxygenase activation protein (YWHAE) (14-3-3 superfamily) | P25C4   | 172006    | 55           | 87.2       | 1.59            |
|                                                                                                     |         | 169709    | 59           | 39.2       | 0.66            |
| von Willebrand factor A domain-containing protein-5a                                                | P10C23  | 206365    | 9            | 6.3        | 0.70            |
|                                                                                                     |         | 156990    | 12           | 12.6       | 1.05            |
|                                                                                                     |         | 157297    | 8            | 7.6        | 0.95            |

NB: BLAST searches of the transcriptome using cyplasin, two hypothetical proteins, and two ribosomal sequences did not retrieve significant alignments. Thus we were unable to determine the direction of expression values for these five genes.
